# Supplementary material for: Chronic hyperglycaemia increases the vulnerability of the hippocampus to oxidative damage induced during post-hypoglycaemic hyperglycaemia in a mouse model of chemically induced type 1 diabetes
Source: PubMed Central journal article supplement (PMC10244284; doi:10.1007/s00125-023-05907-6), 2023-04-04
Supplement: 125_2023_5907_MOESM1_ESM.pdf [file 125_2023_5907_MOESM1_ESM.pdf]

**ESM Table 1. Transcript abundance of Nrf2 target genes in Control and STZ- diabetic mice**

|               | A (WT-EE) | B (WT-LE)  | C (WT-LH) | D (STZ-HH) | E (STZ-LE) | F (STZ-LH) |
|---------------|-----------|------------|-----------|------------|------------|------------|
| <i>Nrf2</i>   | 1.0±0.04  | 0.98±0.05  | 1.16±0.12 | 1.48±0.03* | 1.28±0.08* | 1.79±0.12* |
| <i>Nqo1</i>   | 1.0±0.03  | 0.94±0.03  | 0.87±0.03 | 1.53±0.15* | 1.39±0.19  | 1.53±0.09* |
| <i>Sod2</i>   | 0.99±0.04 | 4.83±0.03* | 0.59±0.51 | 5.73±0.61* | 0.69±0.06  | 1.67±0.11* |
| <i>Hmox-1</i> | 0.99±0.09 | 1.42±0.10* | 0.92±0.10 | 0.85±0.05  | 0.89±0.04  | 1.11±0.11  |

Control (WT) mice, groups A-C; Type 1 diabetic (STZ) mice, groups D-F. Clamp protocols: E = Euglycemia, L = Hypoglycaemia, H = Hyperglycaemia. Ratios presented relative (to A (EEE)) gene expression of NAD(P)H: quinoneoxidoreductase 1 (*Nqo1*), superoxide dismutase 2 (*Sod2*), hemeoxygenase 1 (*Hmox-1*),  $n = 10-12$ /group. Data were analysed by Kruskal-Wallis with Dunn's multiple comparisons test. Results represent mean values  $\pm$  SEM. \* $P < 0.05$ , vs WT-EE

**ESM Table 2. Transcript abundance of Nrf2 target genes in *Nrf2*<sup>-/-</sup> mice**

|               | G (Nrf-EE) | H (Nrf2-LE) | I (Nrf2-LH) |
|---------------|------------|-------------|-------------|
| <i>Nqo1</i>   | 1.0±0.04   | 0.99±0.09   | 0.94±0.03   |
| <i>Sod2</i>   | 0.99±0.14  | 1.14±0.21   | 0.91±0.10   |
| <i>Hmox-1</i> | 0.99±0.18  | 1.18±0.32   | 0.97±0.10   |

*Nrf2*<sup>-/-</sup> mice, groups G-I.  $n = 8-10$ /group. Data were analysed by Kruskal-Wallis with Dunn's multiple comparisons test. Results represent mean values  $\pm$  SEM

### ESM Table 3. Upregulated proteins

| Protein names                                                                                                               | Gene names                 | Fold change | p value |
|-----------------------------------------------------------------------------------------------------------------------------|----------------------------|-------------|---------|
| Coiled-coil domain-containing protein 47                                                                                    | <i>Ccdc47</i>              | 1.28        | 0.0066  |
| Non-specific lipid-transfer protein                                                                                         | <i>Scp2</i>                | 1.26        | 0.0279  |
| Serine/threonine-protein phosphatase 4 regulatory subunit 2                                                                 | <i>Ppp4r2</i>              | 1.24        | 0.0134  |
| Alanine--tRNA ligase, cytoplasmic                                                                                           | <i>Aars</i>                | 1.18        | 0.0050  |
| Thyroid hormone receptor-associated protein 3                                                                               | <i>Thrap3</i>              | 1.18        | 0.0075  |
| SWI/SNF complex subunit SMARCC2                                                                                             | <i>Smarcc2</i>             | 1.18        | 0.0434  |
| Trifunctional enzyme subunit alpha, mitochondrial;Long-chain enoyl-CoA hydratase;Long chain 3-hydroxyacyl-CoA dehydrogenase | <i>Hadha</i>               | 1.14        | 0.0233  |
| Phosphatidylinositol 5-phosphate 4-kinase type-2 gamma                                                                      | <i>Pip4k2c</i>             | 1.13        | 0.0100  |
| Trifunctional enzyme subunit beta, mitochondrial;3-ketoacyl-CoA thiolase                                                    | <i>Hadhb</i>               | 1.13        | 0.0242  |
| Proteasome subunit alpha type-2                                                                                             | <i>Psm2</i>                | 1.13        | 0.0439  |
| Small acidic protein                                                                                                        | <i>Smad1;1110004F10Rik</i> | 1.12        | 0.0396  |
| 6-phosphogluconate dehydrogenase, decarboxylating                                                                           | <i>6Pgd</i>                | 1.11        | 0.0195  |
| Long-chain specific acyl-CoA dehydrogenase, mitochondrial                                                                   | <i>Acadl</i>               | 1.11        | 0.0369  |
| Lupus La protein homolog                                                                                                    | <i>Ssb</i>                 | 1.10        | 0.0244  |
| Isoleucine--tRNA ligase, mitochondrial                                                                                      | <i>Iars2</i>               | 1.09        | 0.0130  |
| D-beta-hydroxybutyrate dehydrogenase, mitochondrial                                                                         | <i>Bdh1</i>                | 1.09        | 0.0446  |
| Ornithine aminotransferase, mitochondrial                                                                                   | <i>Oat</i>                 | 1.09        | 0.0426  |
| Heterochromatin protein 1-binding protein 3                                                                                 | <i>Hp1bp3</i>              | 1.09        | 0.0222  |
| Carbonyl reductase [NADPH] 1                                                                                                | <i>Cbr1</i>                | 1.09        | 0.0023  |
| Plastin-3                                                                                                                   | <i>Pls3</i>                | 1.09        | 0.0312  |
| Proteasome subunit alpha type-3                                                                                             | <i>Psm3</i>                | 1.09        | 0.0186  |
| Neurochondrin                                                                                                               | <i>Ncdn</i>                | 1.09        | 0.0342  |
| Fructose-bisphosphate aldolase C                                                                                            | <i>Aldoc</i>               | 1.08        | 0.0289  |
| Lamin-B1                                                                                                                    | <i>Lmnb1</i>               | 1.08        | 0.0180  |
| 60S acidic ribosomal protein P1                                                                                             | <i>Rplp1;Gm10073</i>       | 1.08        | 0.0384  |
| Succinyl-CoA:3-ketoacid coenzyme A transferase 1, mitochondrial;Succinyl-CoA:3-ketoacid-coenzyme A transferase              | <i>Oxct1</i>               | 1.07        | 0.0196  |
| Proteasome subunit beta type-7                                                                                              | <i>Psm7</i>                | 1.07        | 0.0403  |
| Electron transfer flavoprotein subunit alpha, mitochondrial                                                                 | <i>Etfa</i>                | 1.06        | 0.0343  |
| Nucleolin                                                                                                                   | <i>Ncl</i>                 | 1.06        | 0.0493  |
| NADH dehydrogenase [ubiquinone] 1 beta subcomplex subunit 3                                                                 | <i>Ndufb3</i>              | 1.06        | 0.0388  |
| Protein DJ-1                                                                                                                | <i>Park7</i>               | 1.05        | 0.0162  |
| Ubiquitin carboxyl-terminal hydrolase;Ubiquitin carboxyl-terminal hydrolase 14                                              | <i>Usp14</i>               | 1.05        | 0.0228  |
| Acyl carrier protein;Acyl carrier protein, mitochondrial                                                                    | <i>Ndufab1</i>             | 1.05        | 0.0185  |
| NADH dehydrogenase [ubiquinone] iron-sulfur protein 6, mitochondrial                                                        | <i>Ndufs6</i>              | 1.05        | 0.0401  |
| Aldehyde dehydrogenase, mitochondrial                                                                                       | <i>Aldh2</i>               | 1.05        | 0.0137  |
| Phosphoglucomutase-1                                                                                                        | <i>Pgm1;Pgm2</i>           | 1.05        | 0.0285  |
| Actin-binding LIM protein 1                                                                                                 | <i>Ablim1</i>              | 1.04        | 0.0459  |
| Guanine nucleotide-binding protein G(i) subunit alpha-1                                                                     | <i>Gnai1</i>               | 1.03        | 0.0014  |

**ESM Table 4. Downregulated proteins**

| Protein names                                                                 | Gene names       | Fold change | p value |
|-------------------------------------------------------------------------------|------------------|-------------|---------|
| Ubiquitin carboxyl-terminal hydrolase;Ubiquitin carboxyl-terminal hydrolase 5 | <i>Usp5</i>      | 0.96        | 0.0164  |
| Myosin-10                                                                     | <i>Myh10</i>     | 0.96        | 0.0469  |
| Microtubule-associated protein tau                                            | <i>Mapt</i>      | 0.96        | 0.0397  |
| AP2-associated protein kinase 1                                               | <i>Aak1</i>      | 0.95        | 0.0331  |
| Heat shock cognate 71 kDa protein                                             | <i>Hspa8</i>     | 0.95        | 0.0234  |
| Epidermal growth factor receptor substrate 15-like 1                          | <i>Eps15l1</i>   | 0.95        | 0.0390  |
| Thy-1 membrane glycoprotein                                                   | <i>Thy1</i>      | 0.95        | 0.0401  |
| Calcineurin subunit B type 1                                                  | <i>Ppp3r1</i>    | 0.95        | 0.0228  |
| Cytosolic acyl coenzyme A thioester hydrolase                                 | <i>Acot7</i>     | 0.95        | 0.0341  |
| Kinesin-like protein KIF2A                                                    | <i>Kif2a</i>     | 0.94        | 0.0219  |
| AP-3 complex subunit delta-1                                                  | <i>Ap3d1</i>     | 0.94        | 0.0189  |
| Synaptosomal-associated protein 25                                            | <i>Snap25</i>    | 0.93        | 0.0166  |
| Glutaredoxin-3                                                                | <i>Glrx3</i>     | 0.93        | 0.0139  |
| Serine/threonine-protein kinase PAK 1                                         | <i>Pak1</i>      | 0.93        | 0.0100  |
| Elongation factor Tu, mitochondrial                                           | <i>Tufm</i>      | 0.93        | 0.0016  |
| Cysteine and histidine-rich domain-containing protein 1                       | <i>Chordc1</i>   | 0.92        | 0.0410  |
| Gamma-aminobutyric acid receptor-associated protein-like 2                    | <i>Gabarapl2</i> | 0.91        | 0.0118  |
| Cofilin-2                                                                     | <i>Cfl2</i>      | 0.91        | 0.0428  |
| Coronin;Coronin-1A                                                            | <i>Coro1a</i>    | 0.91        | 0.0407  |
| Stress-induced-phosphoprotein 1                                               | <i>Stip1</i>     | 0.90        | 0.0003  |
| Rho-associated protein kinase 2                                               | <i>Rock2</i>     | 0.90        | 0.0451  |
| AMP deaminase 2                                                               | <i>Ampd2</i>     | 0.90        | 0.0109  |
| Mitochondrial glutamate carrier 1                                             | <i>Slc25a22</i>  | 0.90        | 0.0176  |
| Calcyclin-binding protein                                                     | <i>Cacybp</i>    | 0.89        | 0.0300  |
| Glycogen debranching enzyme                                                   | <i>Agl</i>       | 0.88        | 0.0397  |
| Alpha-adducin                                                                 | <i>Add1</i>      | 0.88        | 0.0323  |
| Hsp90 co-chaperone Cdc37                                                      | <i>Cdc37</i>     | 0.88        | 0.0101  |
| Heat shock protein HSP 90-alpha                                               | <i>Hsp90aa1</i>  | 0.88        | 0.0119  |
| Peptidyl-prolyl cis-trans isomerase D                                         | <i>Ppid</i>      | 0.88        | 0.0089  |
| Heat shock protein HSP 90-beta                                                | <i>Hsp90ab1</i>  | 0.87        | 0.0261  |
| Glucose 1,6-bisphosphate synthase                                             | <i>Pgm2L1</i>    | 0.87        | 0.0226  |
| Protein lunapark                                                              | <i>Lnp</i>       | 0.86        | 0.0127  |
| ETS translocation variant 2                                                   | <i>Etv2</i>      | 0.86        | 0.0439  |
| Clusterin;Clusterin beta chain;Clusterin alpha chain                          | <i>Clu</i>       | 0.86        | 0.0078  |
| cGMP-dependent 3,5-cyclic phosphodiesterase                                   | <i>Pde2a</i>     | 0.85        | 0.0394  |
| Nuclear migration protein nudC                                                | <i>Nudc</i>      | 0.85        | 0.0221  |
| Small glutamine-rich tetratricopeptide repeat-containing protein beta         | <i>Sgtb</i>      | 0.83        | 0.0130  |
| Heat shock protein 105 kDa                                                    | <i>Hsph1</i>     | 0.83        | 0.0028  |
| CD99 antigen-like protein 2                                                   | <i>Cd99l2</i>    | 0.78        | 0.0324  |
| Hydroxymethylglutaryl-CoA synthase, cytoplasmic                               | <i>Hmgcs1</i>    | 0.78        | 0.0388  |
| 5-nucleotidase domain-containing protein 3                                    | <i>Nt5dc3</i>    | 0.72        | 0.0267  |
